# Supplementary material for: Morphological, Physiological and Photophysiological Responses of Critically Endangered Acer catalpifolium to Acid Stress
Source: MDPI journal article supplement (doi:10.3390/plants10091958), 2021-09-19
Supplement: s1 [file s1]

## Supportive information

### Morphological, physiological and photophysiological responses of critically endangered *Acer catalpifolium* to acid stress

Yuyang Zhang <sup>1,2</sup>, Tao Yu <sup>2</sup>, Wenbao Ma<sup>3,\*</sup>, Buddhi Dayananda <sup>4</sup>, Kenji Iwasaki<sup>5</sup> and Junqing Li<sup>2,\*</sup>

1 The national-Local Joint Engineering Laboratory of High Efficiency and Superior-Quality Cultivation and Fruit Deep Processing Technology on Characteristic Fruit Trees, College of Plant Science, Tarim University, Alear 843300, China; muyu64@sina.com

2 Beijing Key Laboratory for Forest Resources and Ecosystem Processes, Beijing Forestry University, Beijing 100083, China; yutao123@bjfu.edu.cn

3 Ecological Restoration and Conservation of Forests and Wetlands Key Laboratory of Sichuan Province, Sichuan Academy of Forestry, Chengdu 610081, China

4 School of Agriculture and Food Sciences, the University of Queensland, Brisbane, QLD 4072, Australia; b.dayananda@uq.edu.au

5 Climate Change Cluster (C3), Faculty of Science, University of Technology Sydney, Sydney, NSW 2007, Australia; Kenji.Iwasaki@alumni.uts.edu.au

\* Correspondence: mawenbao\_2021@163.com (W.M.); lijq@bjfu.edu.cn (J.L.)

Table S1 Three-way analysis of variance for the effects of acid treatments on growth, leaf morphological, biomass, gas exchange and chlorophyll parameters of *A.**catalpifolium*

| Types                        | Parameters     | AAM        | AT        | AA        | AAM*AT    | AAM*AA     | AT*AA    | AAM*AT*AA |
|------------------------------|----------------|------------|-----------|-----------|-----------|------------|----------|-----------|
| Growth parameters            | Plant height   | 243.10***  | 7.96**    | 0.08      | 2.30      | 117.55***  | 0.08     | 0.22      |
|                              | Ground stem    | 883.62***  | 14.94***  | 17.27***  | 46.24***  | 6.43*      | 8.54**   | 0.54      |
|                              | Crown          | 676.64***  | 71.49***  | 83.87***  | 21.28***  | 460.05***  | 0.11     | 1.54      |
|                              | Leaf length    | 26.08***   | 16.19***  | 1.76      | 0.18      | 25.20***   | 5.00*    | 0.16      |
| Leaf morphological parameter | Leaf width     | 0.03       | 0.54      | 0.20      | 0.54      | 4.23*      | 0.91     | 0.43      |
|                              | Leaf area      | 5.82*      | 1.78      | 7.68**    | 0.59      | 6.76*      | 1.52     | 23.48***  |
|                              | Leaf weight    | 0.03       | 0.54      | 0.20      | 0.54      | 4.23*      | 0.91     | 0.43      |
|                              | SLA            | 9.48**     | 13.70***  | 12.95***  | 0.02      | 50.58***   | 0.03     | 36.42***  |
|                              | Root           | 78.57***   | 9.85**    | 0.28      | 3.23      | 456.65***  | 5.82*    | 39.52***  |
|                              | Leaf           | 2.11       | 4.82*     | 2.03      | 225.00*** | 266.34***  | 19.15*** | 2.71      |
|                              | Lateral branch | 69.13***   | 16.50***  | 26.36***  | 121.05*** | 383.38***  | 0.872    | 0.04      |
| Biomass parameters           | Stem           | 190.16***  | 1.69      | 68.43***  | 84.30***  | 586.64***  | 16.36*** | 12.60***  |
|                              | Total biomass  | 170.85***  | 0.01      | 16.92***  | 102.95*** | 1344.66*** | 10.44**  | 44.68***  |
|                              | RSR            | 0.24       | 44.81***  | 5.13*     | 274.28*** | 44.80***   | 39.82*** | 0.33      |
|                              | Pn             | 986.84***  | 56.42***  | 28.64***  | 0.76      | 86.33***   | 12.23*** | 4.56*     |
| Gas exchange indices         | Cs             | 11.30**    | 555.34*** | 0.75      | 1.08      | 5.24*      | 34.73*** | 40.06***  |
|                              | Ci             | 1568.78*** | 21.13***  | 61.15***  | 0.02      | 1.75       | 7.62**   | 17.95***  |
|                              | Tr             | 1.63       | 189.25*** | 136.31*** | 35.89***  | 48.09***   | 0.91     | 81.40***  |
|                              | Ls             | 1026.23*** | 102.10*** | 0.25      | 597.15*** | 102.63***  | 2.05     | 7.37**    |
|                              | WUE            | 271.74***  | 54.15***  | 0.09      | 139.59*** | 196.74***  | 51.83*** | 47.14***  |
| Chlorophyll parameters       | Chla           | 0.01       | 1.6       | 0.59      | 6.60*     | 0.55       | 2.46     | 5.63*     |
|                              | Chlb           | 2.32       | 0.46      | 0.20      | 0.01      | 2.65       | 11.65**  | 5.03*     |

|             |        |          |      |          |      |        |        |
|-------------|--------|----------|------|----------|------|--------|--------|
| Total Chl   | 0.29   | 0.46     | 0.45 | 2.84     | 1.15 | 5.07*  | 5.66*  |
| Chl a/b     | 8.06** | 28.36*** | 3.13 | 34.85*** | 0.77 | 5.96*  | 7.43** |
| Carotenoids | 1.97   | 0.42     | 1.80 | 0.34     | 1.09 | 7.73** | 7.34** |

Note: Numbers in the table represent F value of three-way analysis of variance. AAM, AT and AA stand for acid application methods, acid types and acidity of acid treatments. . \*, \*\*, \*\*\* indicate significance at 0.05, 0.01, <0.001 level.

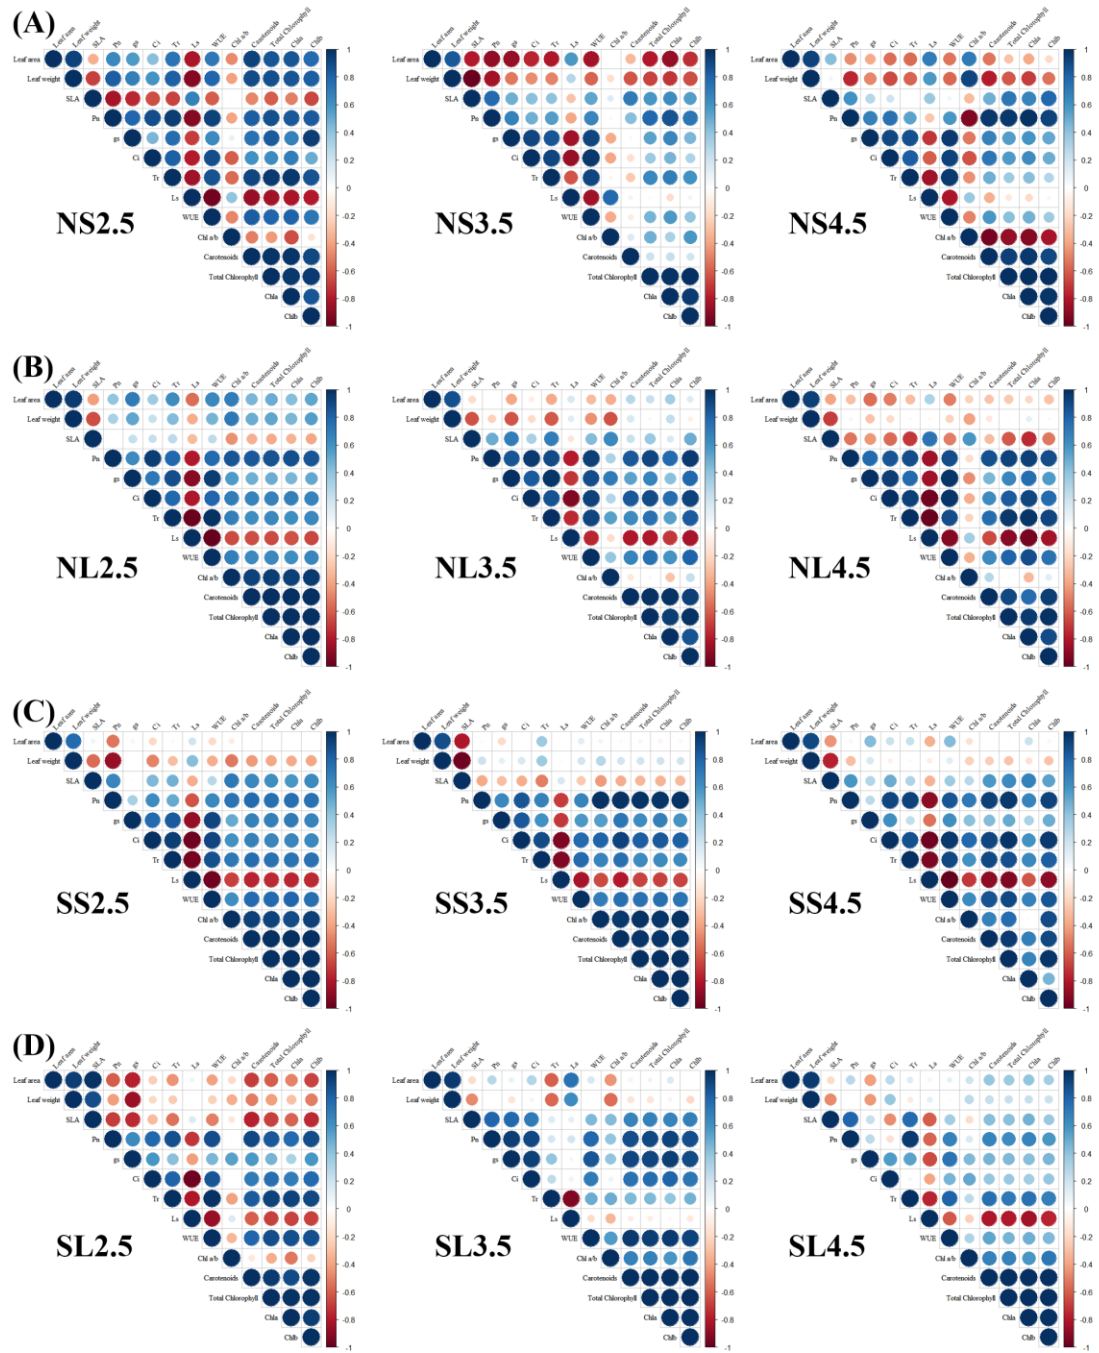

**Figure S1.** Correlation analysis of different foliar morphological and physiological indices of *Acer catalpifolium* under different acidic treatments.
